# Supplementary material
Source: bioRxiv or medRxiv preprint supplement (https://www.biorxiv.org/highwire/filestream/45500/field_highwire_adjunct_files/0/103085-1.pdf)

## Accessible, curated metagenomic data through ExperimentHub

Edoardo Pasolli<sup>\*,1</sup>, Lucas Schiffer<sup>\*,2</sup>, Paolo Manghi<sup>\*,1</sup>, Audrey Renson<sup>2</sup>, Valerie Obenchain<sup>3</sup>, Duy Tin Truong<sup>1</sup>, Francesco Beghini<sup>1</sup>, Faizan Malik<sup>2</sup>, Marcel Ramos<sup>2</sup>, Jennifer B. Dowd<sup>2,4</sup>, Curtis Huttenhower<sup>5,6</sup>, Martin Morgan<sup>3</sup>, Nicola Segata<sup>^,1</sup>, Levi Waldron<sup>^,2</sup>

### Affiliations:

<sup>1</sup> Centre for Integrative Biology, University of Trento, Trento, Italy

<sup>2</sup> Institute for Implementation Science and Population Health, City University of New York School of Public Health, New York, New York, United States of America

<sup>3</sup> Roswell Park Cancer Institute, University of Buffalo, Buffalo, New York, United States of America

<sup>4</sup> Department of Global Health and Social Medicine, King's College London

<sup>5</sup> Biostatistics Department, Harvard School of Public Health, Boston, Massachusetts, United States of America

<sup>6</sup> The Broad Institute, Cambridge, Massachusetts, United States of America

\* Equal contribution

<sup>^</sup> Corresponding authors: [levi.waldron@sph.cuny.edu](mailto:levi.waldron@sph.cuny.edu); [nicola.segata@unitn.it](mailto:nicola.segata@unitn.it)

**Supplemental Table 1:** Study characteristics for the current release (development version 1.3.7) of the curatedMetagenomicData package. Additional details on the datasets are available in the Supplementary Methods.

| Dataset Name         | Body Site   | Disease                        | # Total Samples | # Case Samples | Average Reads per Sample (std) (M) | Size (Tb) | # Reads (G) | Reference |
|----------------------|-------------|--------------------------------|-----------------|----------------|------------------------------------|-----------|-------------|-----------|
| AsnicarF_2017        | Stool, milk | None                           | 26              | -              | 21.4<br>(19.8)                     | 0.2       | 0.5         | 7         |
| BritoL_2016          | Stool, oral | Other condition                | 312             | -              | 67.4<br>(51.8)                     | 5.6       | 21.0        | 8         |
| Castro-NallarE_2015  | Oral        | Schizophrenia                  | 32              | 16             | 61.0<br>(25.2)                     | 0.5       | 2.0         | 9         |
| ChngKR_2016          | Skin        | Atopic dermatitis              | 78              | 38             | 15.8<br>(7.5)                      | 0.3       | 1.2         | 10        |
| FengQ_2015           | Stool       | Colorectal cancer              | 154             | 93             | 53.8<br>(8.5)                      | 2.3       | 8.3         | 11        |
| Heitz-BuschartA_2016 | Stool       | Type 1 diabetes                | 53              | 27             | 44.5<br>(0.9)                      | 0.5       | 2.4         | 12        |
| HMP_2012             | Several     | None                           | 749             | -              | 51.5<br>(44.8)                     | 9.4       | 38.6        | 4         |
| KarlssonFH_2013      | Stool       | Type 2 diabetes                | 145             | 53             | 31.0<br>(17.6)                     | 1.4       | 4.5         | 13        |
| LeChatelierE_2013    | Stool       | Obesity                        | 292             | 169            | 69.0<br>(23.2)                     | 4.0       | 20.1        | 14        |
| LiuW_2016            | Stool       | Other condition                | 110             | -              | 58.3<br>(26.8)                     | 1.8       | 6.4         | 15        |
| LomanNJ_2013         | Stool       | Shiga-toxigenic <i>E. coli</i> | 43              | 43             | 9.2<br>(12.1)                      | 0.1       | 0.4         | 16        |
| NielsenHB_2014       | Stool       | Inflammatory bowel diseases    | 396             | 148            | 53.9<br>(20.2)                     | 3.5       | 21.4        | 17        |
| Obregon-TitoAJ_2015  | Stool       | Other condition                | 58              | -              | 47.1<br>(20.9)                     | 0.6       | 2.7         | 18        |
| OhJ_2014             | Skin        | None                           | 291             | -              | 24.7<br>(38.1)                     | 2.2       | 7.2         | 19        |
| QinJ_2012            | Stool       | Type 2 diabetes                | 363             | 170            | 40.2<br>(11.8)                     | 4.0       | 14.6        | 20        |

|                |       |                   |             |             |                 |             |              |    |
|----------------|-------|-------------------|-------------|-------------|-----------------|-------------|--------------|----|
| QinN_2014      | Stool | Liver cirrhosis   | 237         | 123         | 51.6<br>(30.9)  | 3.0         | 12.2         | 21 |
| RampelliS_2015 | Stool | Other condition   | 38          | -           | 22.3<br>(19.3)  | 0.2         | 0.8          | 22 |
| RaymondF_2016  | Stool | Other condition   | 72          | -           | 135.1<br>(50.4) | 2.7         | 9.7          | 23 |
| SchirmerM_2016 | Stool | None              | 471         | -           | 30.3<br>(8.2)   | 3.1         | 14.3         | 24 |
| TettAJ_2016    | Skin  | Psoriasis         | 97          | 97          | 3.0<br>(5.2)    | 0.1         | 0.3          | -  |
| VatanenT_2016  | Stool | Other condition   | 785         | 171         | 21.0<br>(11.1)  | 4.4         | 16.4         | 25 |
| VincentC_2016  | Stool | CDI               | 229         | 33          | 17.4<br>(12.7)  | 1.6         | 4.0          | 26 |
| VogtmannE_2016 | Stool | Colorectal cancer | 110         | 52          | 66.4<br>(15.6)  | 1.6         | 7.3          | 27 |
| XieH_2016      | Stool | Other condition   | 250         | -           | 72.9<br>(9.1)   | 5.2         | 18.2         | 28 |
| YuJ_2015       | Stool | Colorectal cancer | 128         | 75          | 56.3<br>(10.0)  | 2.1         | 7.2          | 29 |
| ZellerG_2014   | Stool | Colorectal cancer | 199         | 133         | 63.5<br>(26.9)  | 2.9         | 12.6         | 30 |
| <b>TOTAL</b>   | -     | -                 | <b>5718</b> | <b>1441</b> | <b>44.5</b>     | <b>63.3</b> | <b>254.3</b> | -  |

**Supplemental Table 2: Metadata fields available in curatedMetagenomicData**

| Metadata Field                     | Description                                                                                                                                               |
|------------------------------------|-----------------------------------------------------------------------------------------------------------------------------------------------------------|
| adiponectin                        | Curators must use mg/l                                                                                                                                    |
| age                                | Subject age (years)                                                                                                                                       |
| age_category                       | Age category: newborn < 1 year; 1 <= child < 12; 12 <= schoolage < 19; 19 <= adult <= 65; senior > 65                                                     |
| ajcc                               | AJCC staging for colorectal-cancer                                                                                                                        |
| albumine                           | Albumine level; curators must use g/l                                                                                                                     |
| alcohol                            | Subject is reported as a drinker                                                                                                                          |
| antibiotics_current_use            | Subject is currently taking antibiotics                                                                                                                   |
| antibiotics_family                 | Family of antibiotics currently used; Semicolon-separated                                                                                                 |
| bilubirin                          | Bilubirin; curators must use mg/dl                                                                                                                        |
| birth_control_pil                  | Use of the birth-control-pils at the sampling time (men: no)                                                                                              |
| BMI                                | Body mass index (kg/m2)                                                                                                                                   |
| body_site                          | Bodysite of acquisition                                                                                                                                   |
| body_subsite                       | Subsite of body site of acquisition                                                                                                                       |
| cd163                              | Curators must use ng/ml                                                                                                                                   |
| cholesterol                        | Curators must use mg/dl                                                                                                                                   |
| country                            | Country of acquisition using ISO3 code from <a href="http://www.fao.org/countryprofiles/iso3list/en/">http://www.fao.org/countryprofiles/iso3list/en/</a> |
| c-peptide                          | Curators must use ng/ml                                                                                                                                   |
| creatine                           | Curators must use micro-mol/l                                                                                                                             |
| creatinine                         | Curators must use micro-mol/l                                                                                                                             |
| ctp                                | Cytidine triphosphate level                                                                                                                               |
| days_after_onset                   | Days from the onset of the disease                                                                                                                        |
| days_from_first_collection         | Used for time series studies                                                                                                                              |
| disease                            | Semicolon-delimited vector of conditions; Use healthy only if subject is known to be healthy; CRC=colorectal cancer                                       |
| disease_subtype                    | Disease subtype; CD=Chrohn's Disease                                                                                                                      |
| DNA_extraction_kit                 | DNA extraction kit                                                                                                                                        |
| dyastolic_p                        | Measured in mm/Hg                                                                                                                                         |
| ever_smoker                        | Ever been a smoker                                                                                                                                        |
| family                             | A number identifying the family subjects belong; not corrected for meta-analyses                                                                          |
| fasting_insulin                    | Curators must use micro-units/ml                                                                                                                          |
| ferm_milk_prod_consumer            | Dfmp means yes (defined milk product)                                                                                                                     |
| fgf-19                             | Curators must use pg/ml                                                                                                                                   |
| flg-genotype                       | Any term for filaggrin-protein genotype                                                                                                                   |
| fobt                               | Fecal occult blood test                                                                                                                                   |
| gender                             | Subject gender                                                                                                                                            |
| glp-1                              | Curators must use pmol/l                                                                                                                                  |
| glucose                            | Curators must use mg/dl                                                                                                                                   |
| glutamate_decarboxylase_2_antibody | Glutamic acid decarboxylase (GAD65) antibody assay                                                                                                        |
| hba1c                              | Curators must use %                                                                                                                                       |
| hdl                                | Curators must use mg/l                                                                                                                                    |
| hitchip_probe_class                | High/Low species content on the HIT-chip probe                                                                                                            |

|                      |                                                                             |
|----------------------|-----------------------------------------------------------------------------|
| hitchip_probe_number | HIT-chip probe score                                                        |
| hla_dbq11            | Hla_dbq11 allele                                                            |
| hla_dbq12            | Hla_dbq12 allele                                                            |
| hla_dqa11            | Hla_dqa11 allele                                                            |
| hla_dqa12            | Hla_dqa12 allele                                                            |
| hla_drb11            | Hla_drb11 allele                                                            |
| hla_drb12            | Hla_drb12 allele                                                            |
| hscrp                | High-sensitivity C-reactive protein test result                             |
| il-1                 | Curators must use pg/ml                                                     |
| infant_age           | Infant age (days); should be used for infants < 2 years old                 |
| inr                  | International normalized ratio                                              |
| insulin(cat)         | Insulin intake as a boolean                                                 |
| lactating            | Lactating subjects (men: no)                                                |
| ldl                  | Curators must use mg/l                                                      |
| leptin               | Curators must use micrograms/l                                              |
| location             | free-form additional location information                                   |
| median_read_length   | Median read length - calculated from raw data                               |
| mgs_richness         | Metagenomic species richness                                                |
| minimum_read_length  | Minimum read length - calculated from raw data                              |
| momeducat            | Years of education of the mother of the subject (yeah: funny)               |
| mumps                | Subject has been through mumps in life                                      |
| NCBI_accession       | Semicolon-separated vector of NCBI accessions                               |
| non_westernized      | Subject belongs to a non-westernized community                              |
| number_bases         | Total number of bases sequenced in the sample                               |
| number_reads         | Number of final reads - calculated from raw data                            |
| PMID                 | Identifier of the main publication in PubMed                                |
| pregnant             | Pregnancy of the subject (men: no)                                          |
| protein_intake       | Indication about the protein intake in the Mongolians diet                  |
| prothrombin_time     | Prothrombin time in seconds                                                 |
| sampleID             | Sample identifier                                                           |
| sequencing_platform  | This will be modified as new sequencing platforms are added to the database |
| shigatoxin_2_elisa   | Enzyme-linked immunosorbent assay for Shiga-toxigenic E.coli                |
| smoker               | Currently a smoker at sampling                                              |
| start_solidfood      | First day of solid food introduction (newborns)                             |
| stec_count           | Amount of STEC colonies detected                                            |
| stool_texture        | Texture of the stool at sampling time                                       |
| study_condition      | The main disease or condition under study; control for controls             |
| subjectID            | Subject identifier                                                          |
| systolic_p           | Measured in mm/Hg                                                           |
| tnm                  | TNM classification for colorectal-cancer                                    |
| triglycerides        | Curators must use mg/l                                                      |
| visit_number         | Visit number for studies with repeated visits                               |

---

**Supplemental Figure 1: Health status classification from species abundance.** Six different classification problems of health status were attempted using a random forest algorithm and cross-validation to estimate prediction accuracy. Plots show ROC curves by using species abundance as microbiome features, one of the five data types considered in the Example 1 of **Figure 1**. Results are consistent with the meta-analysis conducted in <sup>31</sup>.

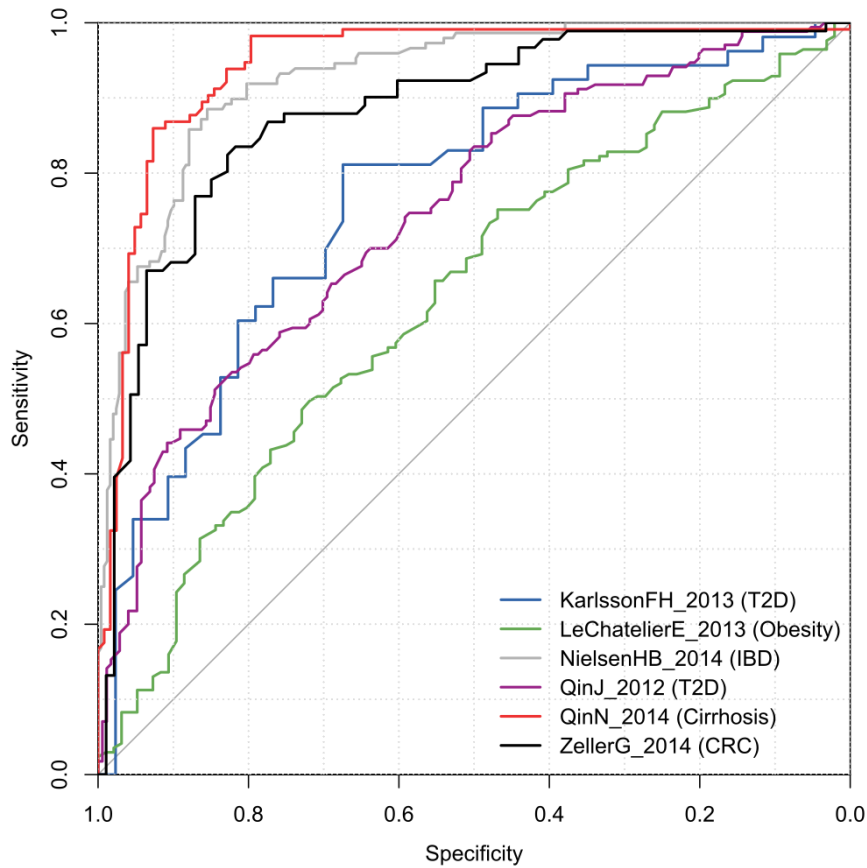

**Supplemental Figure 2:** Principal Coordinates Analysis (PCoA) plot of species abundance for stool samples on selected diseases. Specimens are annotated by disease state (shape), study name (color), and abundance of *Prevotella copri* (size).

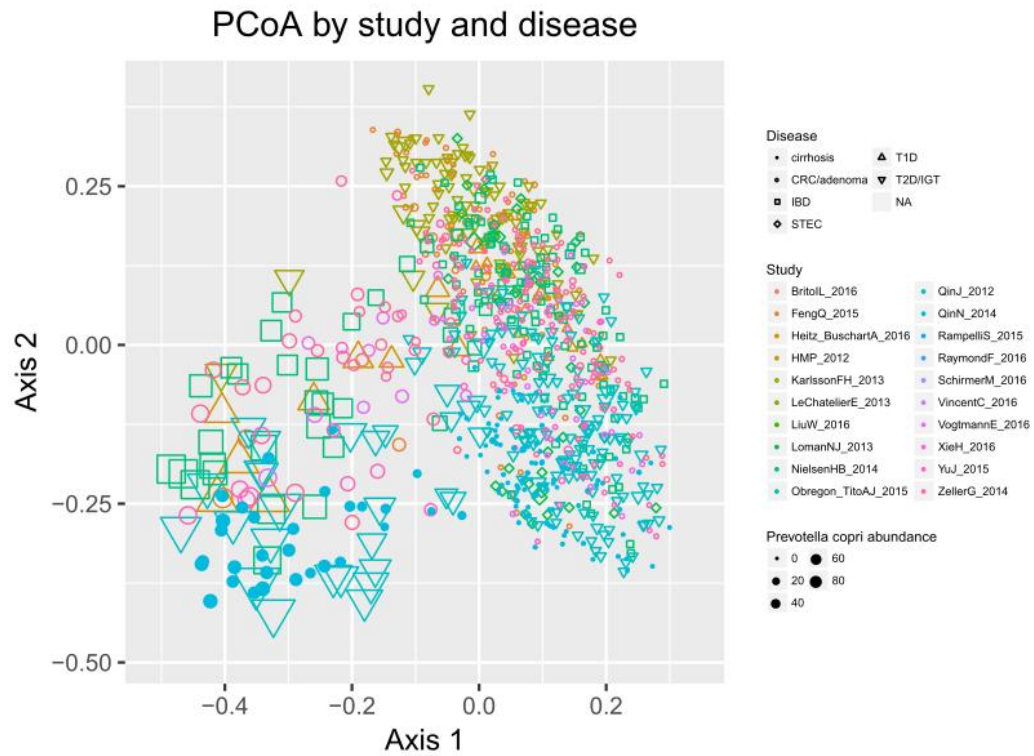

**Supplemental Figure 3. Clustering scores for enterotypes in gut WGS samples.** Consistent with Koren *et al.*<sup>5</sup>, these plots indicate weak support for any discrete clustering in the data and confirm that the three enterotypes hypothesis is likely an oversimplification that does not hold when considering large set of biogeographically diverse populations. Thresholds for significance of clustering are presented as dashed lines, and are the same thresholds used by Koren *et al.*<sup>5</sup>. Each plot line represents an analysis that can be accomplished with one line of code using the R packages ‘fpc’ (prediction strength and Calinski-Harabasz) and ‘cluster’ (silhouette index), provided in the curatedMetagenomicData package examples.

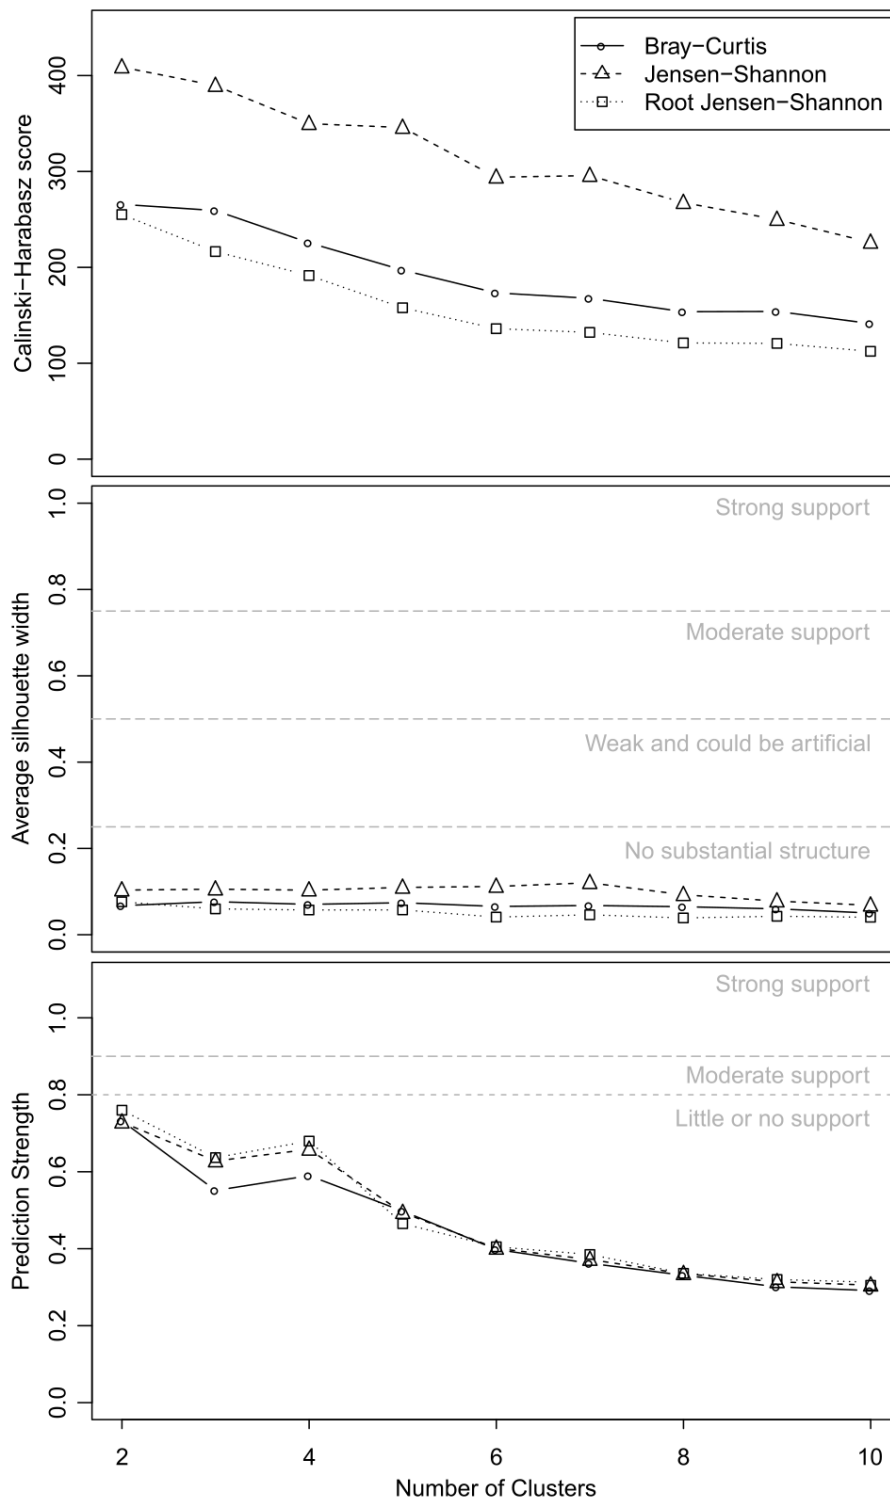





**Supplemental Figure 5: Alpha diversity of taxa from 22 studies of the gut microbiome.** Shannon Alpha Diversity was calculated for each individual sample within each human gut microbiome study. The median diversity varies by a maximum factor of 1.5 between studies, however the variability within studies as measured by interquartile range varies by more than 3-fold.

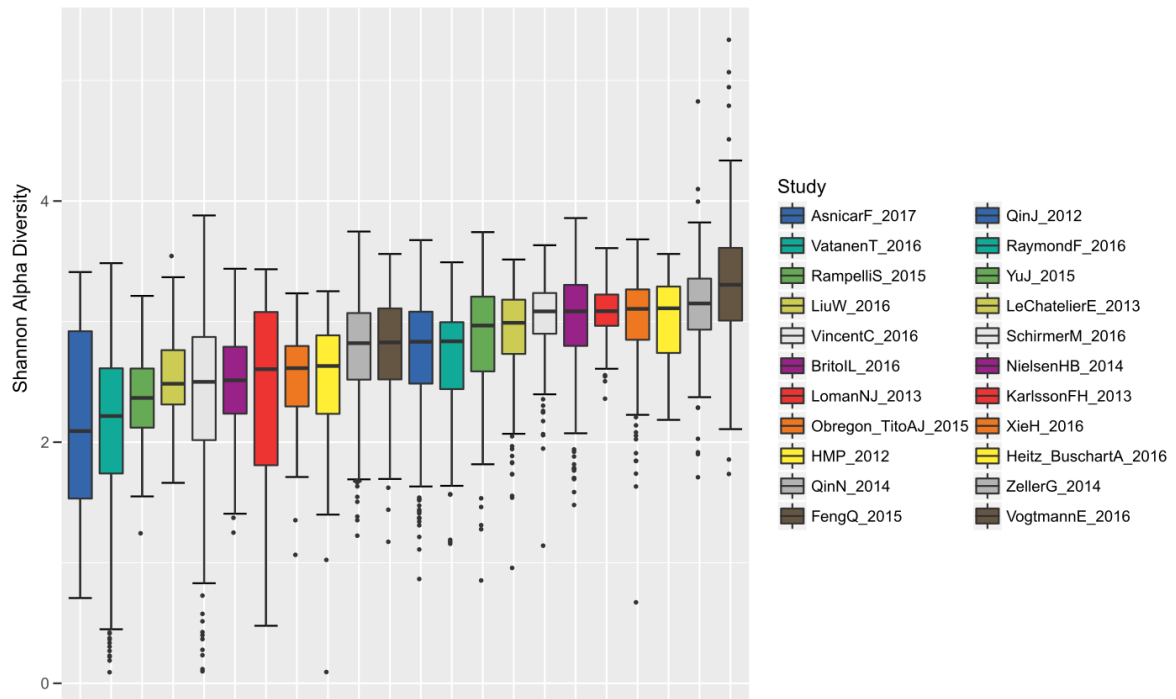

Supplement: Supplementary file [file 103085-1.pdf]
